# Supplementary material
Source: publisher site journal article supplement (https://www.dovepress.com/article/supplementary_file/605940/605940%20Appendix%20File.docx)
Supplement: Supplementary file 1 [file 605940%20Appendix%20File.docx]

## Appendix 1: OHMDT Nurse Competency Scale Items

**Scoring:** Each item is rated on a 5-point Likert scale (1 = completely unable, 2 = barely able, 3 = somewhat able, 4 = quite able, 5 = completely able). Total scores range from 23 to 115, with higher scores indicating greater competence.

**Dimension 1: Specialized Clinical Competence**

| **Item** | **Content** |
| --- | --- |
| Q1 | Mastery of oral multidisciplinary basic theories |
| Q2 | Ability to prepare interdisciplinary instruments and materials |
| Q3 | Competence in assisting multidisciplinary combined surgeries |
| Q4 | Ability to identify complication risks |
| Q5 | Competence in using digital diagnostic and treatment equipment |
| Q6 | Ability to perform comprehensive systematic oral health assessment |

**Dimension 2: Interdisciplinary Coordination and Collaboration**

| **Item** | **Content** |
| --- | --- |
| Q7 | Competence in coordinating scheduling of different specialists |
| Q8 | Ability to accurately report nursing issues in MDT discussions |
| Q9 | Ability to assist in resolving disagreements between specialties |
| Q10 | Competence in handling cross-department referrals |
| Q11 | Ability to share information with team members |

**Dimension 3: Patient Full-Cycle Management and Humanistic Care**

| **Item** | **Content** |
| --- | --- |
| Q12 | Competence in developing personalized full-cycle health education |
| Q13 | Ability to use psychological nursing techniques to relieve fear |
| Q14 | Ability to manage follow-up and tracking |
| Q15 | Competence in explaining complex procedures in plain language |
| Q16 | Commitment to respecting and protecting patient privacy rights |

**Dimension 4: Professional Qualities and Emergency Responsiveness**

| **Item** | **Content** |
| --- | --- |
| Q17 | Competence in rapidly responding to medical emergencies |
| Q18 | Ability to adapt to high-intensity, fast-paced OMDT environment |
| Q19 | Ability to identify safety hazards and propose improvements |
| Q20 | Commitment to proactively learning new OMDT nursing developments |
| Q21 | Ability to participate in or assist clinical nursing research |
| Q22 | Competence in properly handling doctor-patient disputes |
| Q23 | High professional identity for OMDT nursing work |

*Note.* The Delphi-derived dimensional labels (above) reflect the theoretical framework used during item development. The EFA-derived factor names partially reorganize item clusters based on empirical loading patterns; both frameworks are presented to facilitate interpretation and comparison with future CFA studies.
